1

2

3 **THE ARYL HYDROCARBON RECEPTOR PROMOTES DIFFERENTIATION**

4 **DURING MOUSE PREIMPLANTATIONAL EMBRYO DEVELOPMENT**

5

6 **Ana Nacarino-Palma<sup>1,2</sup>, Jaime M. Merino<sup>1,2\*</sup> and Pedro M. Fernández-Salguero<sup>1,2\*</sup>**

7

8 <sup>1</sup>Departamento de Bioquímica y Biología Molecular, Facultad de Ciencias, Universidad

9 de Extremadura, Avenida de Elvas s/n, 06071 Badajoz, Spain; <sup>2</sup>Instituto de Investigación

10 Biosanitaria de Extremadura (INUBE), Avenida de la Investigación s/n, 06071 Badajoz,

11 Spain.

12

13 \*Corresponding authors:

14 Pedro M. Fernández-Salguero, Email: [pmfersal@unex.es](mailto:pmfersal@unex.es)

15 Jaime M. Merino, Email: [jmmerino@unex.es](mailto:jmmerino@unex.es)

16 Tel: +34 924289300 Ext. 86895

17

18 **Keywords:** Aryl hydrocarbon receptor, Embryo Differentiation, Pluripotency, Hippo,

19 Preimplantation

20

21 **Abbreviations:** AhR, Aryl Hydrocarbon Receptor; ICM, internal cell mass; TE,

22 trophoctoderm; TMRM, Tetramethylrhodamine; YAP, Yes-activated protein;

23

24

25

26 **ABSTRACT**

27 Mammalian embryogenesis is a complex process controlled by transcription factors that  
28 dynamically regulate the balance between pluripotency and differentiation. Transcription  
29 factor AhR is known to regulate *Oct4/Pou5f1* and *Nanog*, both essential genes in  
30 pluripotency, stemness and early embryo development. Yet, the molecular mechanisms  
31 controlling *Oct4/Pou5f1* and *Nanog* during embryo development remain largely  
32 unidentified. Here, we show that AhR is required for proper embryo differentiation by  
33 regulating pluripotency factors and by maintaining adequate metabolic activity. AhR  
34 lacking embryos (*AhR*<sup>-/-</sup>) showed a more pluripotent phenotype characterized by a  
35 delayed expression of differentiation markers of the first and second cell divisions.  
36 Accordingly, central pluripotency factors OCT4/POU5F1, NANOG, and SOX2 were  
37 overexpressed in *AhR*<sup>-/-</sup> embryos at initial developmental stages. An altered intracellular  
38 localization of these factors was observed in absence of AhR and, importantly, OCT4 had  
39 an opposite expression pattern with respect to AhR from the 2-cell stage to blastocyst,  
40 suggesting a negative regulatory mechanism of OCT4/POU5F1 by AhR. Hippo signalling,  
41 rather than being repressed, was upregulated in very early *AhR*<sup>-/-</sup> embryos, possibly  
42 contributing to their undifferentiation at later stages. Consistently, AhR-null blastocysts  
43 overexpressed the early marker of inner cell mass (ICM) differentiation Sox17 whereas  
44 downregulated extraembryonic differentiation-driving genes *Cdx2* and *Gata3*. Moreover,  
45 the persistent pluripotent phenotype of *AhR*<sup>-/-</sup> embryos was supported by an enhanced  
46 glycolytic metabolism and a reduction in mitochondrial activity. We propose that AhR is  
47 a regulator of pluripotency and differentiation in early mouse embryogenesis and that its  
48 deficiency may underline the reduced viability and increased resorptions of AhR-null  
49 mice.

50

51 **INTRODUCTION**

52       The aryl hydrocarbon receptor (AhR) is a transcription factor with important  
53 toxicological and physiological implications and roles in pluripotency and stemness  
54 recently identified (Ko and Puga, 2017; Mulero-Navarro and Fernandez-Salguero, 2016;  
55 Roman et al., 2018). Several studies support this receptor as an important regulator of the  
56 balance between pluripotency and differentiation under physiological conditions and in  
57 tumor cells. Indeed, AhR activation by the carcinogen TCDD during mouse pregnancy  
58 blocked the ability of hematopoietic stem cells (HSC) for long-term self-renewal (Laios  
59 et al., 2015). Similarly, sustained AhR activation during early differentiation of mouse  
60 embryonic stem cells impaired signalling critical for the ontogeny of cardiac mesoderm  
61 and cardiomyocyte functions (Wang et al., 2016). Previous work from our laboratory  
62 using human NTERA-2 cells revealed that AhR supports cell differentiation through the  
63 transcriptional repression of retrotransposable *Alu* elements located in the promoter  
64 region of pluripotency genes *Oct4* and *Nanog* (Morales-Hernandez et al., 2016). On the  
65 contrary, receptor deficiency in mice produces a more undifferentiated phenotype  
66 improving the regenerative potential of the lung (Morales-Hernandez et al., 2017) and the  
67 liver (Moreno-Marin et al., 2017) upon acute damage.

68       A distinguishing feature of preimplantation development is the gradual loss of  
69 totipotence of the embryonic stem cells (ESCs). Throughout embryonic development  
70 from zygote to blastocyst, ESCs will restrict their fate through cellular differentiation  
71 after successive rounds of cell division. Three different cell lineages exist in the mature  
72 blastocyst; namely, trophoctoderm, epiblast and primitive endoderm (Chazaud and  
73 Yamanaka, 2016). In the first cell fate decision, asymmetric divisions in the initial embryo  
74 generate outside and inside cells that differ in their cellular properties, location within the  
75 embryo and cell outcome (Fleming, 1987; Johnson and Ziomek, 1981; Morris et al.,

76 2010). Outside cells will differentiate into the trophoctoderm (TE), which is the precursor  
77 lineage of the placenta. Inside cells constitute the pluripotent inner cell mass (ICM) that  
78 will differentiate in the second cell fate decision to form the primitive endoderm (PE)  
79 giving rise to the yolk sac, and the pluripotent embryonic epiblast (EPI) that is the  
80 precursor of all embryonic tissues. Numerous signalling networks are responsible for  
81 coordinating the myriad events needed to control the balance between differentiation and  
82 pluripotency in embryogenesis. Transcription factors OCT4/POU5F1 (herein OCT4),  
83 SOX2 and NANOG constitute the "central pluripotency network" (Boyer et al., 2005;  
84 Boyer et al., 2006). These pluripotency factors are initially expressed in all cells of the  
85 morulae, with their expression becoming gradually restricted to the ICM after first cell  
86 fate decision (Bedzhov et al., 2014). Establishment of TE fate program in outside cells is  
87 regulated by the Hippo pathway, which acts as a sensor of cell polarity.

88 Outside cells have asymmetric cell-cell contacts that lead to the accumulation of  
89 apical polarity proteins that inhibit activity of the tight junction proteins AMOT and the  
90 Hippo pathway kinases LATS1/2 (Leung and Zernicka-Goetz, 2013; Paramasivam et al.,  
91 2011). As a result, hypophosphorylated Yes-activated protein (YAP) is translocated to  
92 the nucleus and the TE cell fate program is activated with an increase in CDX2 expression  
93 through TEAD4. In inside cells, symmetric cell-cell contacts prevent the establishment  
94 of an apical domain. AMOT proteins are then activated and distributed by all membrane  
95 in adherent junctions in a NF2/ $\alpha$ -Catenin/ $\beta$ -catenin/E-cadherin complex. In addition,  
96 LAST1/2 become activated and the resulting phosphorylated YAP excluded from the  
97 nucleus; OCT4 is then expressed and the pluripotency program initiated to determine the  
98 ICM fate (Manzanares and Rodriguez, 2013).

99 Knowing how cell fate is specified in the preimplantation embryo may help to understand  
100 the mechanisms that regulate pluripotency and differentiation of stem cells of embryonic  
101 origin as well as those arising from tumors.

102 Interestingly, early and previous reports have shown that AhR-null mice have a  
103 reduced fertility producing fewer numbers of pups born alive as compare to AhR-  
104 expressing littermates. In fact, such phenotype seems to be at least partially due to an  
105 increase in embryo resorption and to an impaired ability to complete the preimplantation  
106 program to the blastocyst stage (Abbott et al., 1999; Peters and Wiley, 1995). Here, we  
107 have studied how AhR affects the early stages of preimplantation during mouse  
108 development in an attempt to further understand receptor functions in pluripotency and  
109 differentiation. We have found that AhR has pro-differentiation functions in the early  
110 mouse embryo needed to specify the different cell fates from the one-cell to the blastocyst  
111 stage. Our results suggest that AhR has relevant roles in embryonic stem cell  
112 differentiation through the control of genes responsible for maintaining a pluripotent  
113 status. AhR deficiency may thus negatively affect embryo progression during  
114 preimplantation eventually compromising viability.

115

116

117

118

119

120

121

122

123

124 RESULTS

125 **AhR expression and localization is modulated throughout embryonic development**

126 To analyze the role of AhR in early embryo differentiation, we first analyzed AhR  
127 expression levels along different embryonic stages. Confocal immunofluorescence  
128 analysis showed that AhR was significantly and steadily expressed as differentiation  
129 progressed from 2-cell zygote to blastocyst (**Fig. 1A,B**). Regarding AhR localization  
130 within the embryo, the immunofluorescence analysis revealed a generalized expression  
131 in all cells up to the morulae stage with some cells having nuclear AhR. However, as  
132 differentiation progressed to the early and late blastocyst, AhR was only detected in the  
133 external blastomeres being almost absent in those cells forming the ICM (**Fig. 1A**). To  
134 further support this finding, we separated inner and outer (TE) blastomeres from  
135 blastocysts using magnetic-activated cell sorting and analyzed AhR expression in both  
136 fractions. The results confirmed that AhR mRNA levels were significantly higher in TE  
137 blastomeres than in inner cell mass blastomeres (**Fig. 1C**). Consistently, AhR mRNA  
138 expression significantly increased during differentiation from zygote to blastocyst at the  
139 transcriptional level (**Fig. 1D**). These results indicated that the expression of the aryl  
140 hydrocarbon receptor is modulated throughout early embryonic development and that its  
141 embryonic localization changes with differentiation.

142 **AhR deficiency induces upregulation of pluripotency genes during early embryo**  
143 **development**

144 In order to assess whether the aryl hydrocarbon receptor participates in the  
145 maintenance of pluripotency during the early stages of embryogenesis, we next analyzed  
146 the levels of pluripotency factors throughout preimplantation in wild type and AhR-null  
147 embryos. *AhR*<sup>-/-</sup> embryos showed significantly higher *Nanog* and *Oct4* mRNA levels as  
148 compared to *AhR*<sup>+/+</sup> embryos from 1-cell zygote until the morulae stage (**Fig. 2A,B**). In

149 blastocysts, *Oct4* expression kept rising in AhR-null embryos while *Nanog* mRNA levels  
150 became balanced among both genotypes (**Fig. 2A,B**). Regarding *Sox2*, embryos lacking  
151 AhR also had higher expression of this pluripotency factor at the beginning of  
152 embryogenesis, 1-cell and 2-cell stages, to decrease to similar levels in both genotypes  
153 from 8-cell to blastocyst (**Fig. 2C**). Thus, AhR plays a role in controlling the expression  
154 of genes known to regulate pluripotency and the differentiation required for embryo  
155 development.

### 156 **AhR modulates the localization of pluripotency factors during embryogenesis.**

157 To investigate how AhR affects protein levels and localization of pluripotency  
158 factors, we did immunofluorescence analysis for OCT4 and NANOG in wild type and  
159 AhR-null embryos during blastocyst development. The results obtained showed changes  
160 in OCT4 and NANOG localization upon the presence of the aryl hydrocarbon receptor.  
161 In wild type embryos, OCT4 had a preferred cytoplasmic localization up to the early  
162 blastocyst stage, to then move to the nucleus in cells at the ICM (**Fig. 3A**). Embryos  
163 lacking AhR showed nuclear localization of OCT4 throughout most stages of  
164 development and up to late blastocyst (**Fig 3A**). We then decided to analyze OCT4  
165 expression at the mRNA level in isolated blastomeres from the ICM and TE of both  
166 genotypes. We found that in *AhR*<sup>-/-</sup> embryos, there were no significant differences in  
167 OCT4 mRNA expression between ICM and TE blastomeres, as it was observed in  
168 *AhR*<sup>+/+</sup> embryos (**Fig 3B**). These results indicate that AhR may be needed to regulate  
169 the location of OCT4 within the embryo, which could impact differentiation and cell fate.  
170 The fact that OCT4 has a location pattern opposite to that of AhR (**Figs. 1 and 3C**),  
171 suggests that AhR may exert a negative regulation on OCT4 to drive embryo  
172 differentiation.

173 NANOG localization in *AhR*<sup>+/+</sup> embryos was also modified in the absence of  
174 AhR. The dotted and regular pattern that this protein had from zygote to 4-cell in AhR  
175 wild type embryos, remained in AhR-null embryos until the 16-cell stage (**Fig 4**). While  
176 in AhR wild type embryos a polarized and nuclear distribution of NANOG between ICM  
177 and TE was observed from morulae on, a delocalization of this pluripotency factor was  
178 evident in AhR lacking embryos (**Fig 4**). Quantification of the immunofluorescence  
179 signals revealed that global NANOG expression was significantly higher in *AhR*<sup>-/-</sup> than  
180 in *AhR*<sup>+/+</sup> embryos (**Fig. 4B**). These data suggest that, in addition to OCT4, AhR could  
181 also regulate NANOG expression during embryo development.

#### 182 **AhR-null embryos show Hippo signalling upregulation**

183 As indicated above, the Hippo pathway is implicated in cell polarity and cell fate.  
184 Next, we explored if the effects of AhR on embryonic differentiation could be mediated  
185 through the Hippo pathway. To investigate such possibility, we first analyzed the nuclear  
186 localization of the Hippo effector YAP. YAP was excluded from the cell nucleus in AhR-  
187 null embryos during most of embryo development, whereas it was located in the nucleus  
188 of the external blastomeres in wild type embryos from the morulae stage (**Fig 5A**).  
189 Immunofluorescence analysis indicated that pYAP was predominantly excluded from the  
190 cell nucleus in a fraction of blastomeres in AhR-null blastocysts (**Fig. 5B**). Quantification  
191 of the mean fluorescence intensity (MFI) revealed that pYAP levels (e.g. cytosolic) were  
192 significantly higher in *AhR*<sup>-/-</sup> embryos (**Fig. 6A**) and, consequently, that the amounts of  
193 nuclear YAP (unphosphorylated) were reduced in absence of AhR (**Fig. 6B**).

194 To further analyze the implication of the Hippo pathway, we measured the  
195 expression of the kinases responsible for YAP phosphorylation *Lats1* and *Lats2*. The  
196 results showed that their expression was significantly higher at the beginning of  
197 development (1-cell and 2-cell) in embryos lacking the aryl hydrocarbon receptor than in



198 wild type ones (**Fig 6C,D**). Interestingly, the levels of both kinases transiently decreased  
199 from 8-cell to morulae to increase again at the blastocyst stage (**Fig 6C,D**). In addition,  
200  $\beta$ -catenin, a component of the complex located at the adherent junctions where AMOT is  
201 retained, was overexpressed at the initial stages of development in *AhR*<sup>-/-</sup> embryos (**Fig.**  
202 **6E**). The early marker for ICM pluripotency and undifferentiation *Sox17*, was also  
203 overexpressed in *AhR*<sup>-/-</sup> blastocysts (**Fig. 6F**), in agreement with previous studies  
204 indicating that *Sox17* is expressed at ICM as a endoderm primitive marker (Artus et al.,  
205 2011; Frum and Ralston, 2015). Moreover, the transcriptional YAP target *Cdx2* was  
206 repressed in *AhR*-null morulae with respect to wild type morulae (**Fig. 6G**). *Cdx2*  
207 expression was significantly higher in TE than in ICM from *AhR*<sup>+/+</sup> blastocysts (**Fig.**  
208 **6H**) whereas no significant differences were found in *Cdx2* distribution between the ICM  
209 and TE in *AhR*<sup>-/-</sup> blastocysts (**Fig. 6I**), further supporting an increased activation of the  
210 Hippo pathway, concomitant with a reduced transcriptional activity of the OCT4  
211 repressor YAP, in absence of AhR. *Gata3*, a trophoectoderm marker in blastocysts, had  
212 lower levels in *AhR*<sup>-/-</sup> embryos at the blastocyst phase (**Fig. 6J**) supporting that lack of  
213 AhR promotes a more undifferentiated phenotype in preimplantation mouse embryos.  
214 Altogether, these data suggest that absence of AhR affects differentiation of the TE and  
215 ICM as the two first cell lineages established in the embryo.

216 **Embryos lacking AhR show a higher glycolytic metabolic activity and a lower rate**  
217 **of oxidative metabolism.**

218 The more undifferentiated status of *AhR*<sup>-/-</sup> embryos could be associated to a more  
219 immature physiological phenotype. We next decided to study glycolytic and oxidative  
220 metabolism rates since it is well established that these two parameters are strongly linked  
221 to the pluripotency state of embryonic stem cells. First, we analyzed the mitochondrial  
222 membrane potential of embryos of both genotypes at different stages using tetramethyl

223 rhodamine (TMRM) staining. Embryos lacking AhR maintained a lower mitochondrial  
224 activity until the 32-cell stage, while wild type embryos had a significantly higher  
225 mitochondrial activity during the same period (**Fig. 7A,B**). To further assess this result,  
226 we collected pools of *AhR*<sup>-/-</sup> and *AhR*<sup>+/+</sup> embryos and analyzed their mitochondrial  
227 membrane potential using the JC-10 probe. The results confirmed that the mitochondrial  
228 membrane potential was higher in wild-type than in AhR-null embryos (**Fig. 7C**).  
229 Moreover, the mitochondrial volume measured by mitotracker green staining was  
230 significantly lower in *AhR*<sup>-/-</sup> than in *AhR*<sup>+/+</sup> embryos (**Fig. 7D**), as well as the mRNA  
231 levels of the marker for mitochondrial activity mitochondrial carrier homolog-1 (*Mtch1*)  
232 (**Fig. 7E**). These results indicate that lack of AhR may contribute to a lower rate of  
233 oxidative metabolism in the mouse embryo.

234       Next, we investigated if glycolytic metabolism, the preferred energy source for  
235 pluripotent and cancerous cells, would be influenced by AhR activity throughout  
236 embryonic differentiation. We observed that the expression of the hexokinase enzyme  
237 (*HK*) and of glucose transporters *Scl2a1* and *Scl2a3* were increased in *AhR*<sup>-/-</sup> as compared  
238 to *AhR*<sup>+/+</sup> blastocysts (**Fig. 8A-C**). We then decided to measure hexokinase activity  
239 using an enzymatic assay in embryos at developmental stages between morulae and  
240 blastocyst. The results obtained revealed that absence of AhR generated a significant  
241 increase in hexokinase activity (**Fig. 8D**). The less differentiated status of AhR deficient  
242 embryos with respect to wild type ones correlates with their preferential glycolytic  
243 metabolism. Thus, lack of AhR alters mitochondrial functions that are consistent with a  
244 more pluripotent phenotype. Stem cells specifically use the amino acid threonine to  
245 maintain their pluripotent status and such cellular condition is dependent on the activity  
246 of the threonine dehydrogenase (TDH) (Wang et al., 2009). We have found that TDH  
247 expression was increased in absence of AhR along embryonic development from 1-cell

248 zygote to blastocyst, supporting that AhR-null preimplantation embryos have an altered  
249 metabolic profile.

250

251

252

253

254

255

256

257

258

259

260

261

262

263

264

265

266

267

268

269

270

271

272

273 **DISCUSSION**

274 AhR promotes cell differentiation through the inhibition of pluripotency genes.  
275 As a result, AhR deficiency originates an undifferentiated phenotype not only in cell lines  
276 but also in tissue regeneration in mice (Morales-Hernandez, Gonzalez-Rico et al. 2016,  
277 Morales-Hernandez, Nacarino-Palma et al. 2017, Moreno-Marin, Barrasa et al. 2017).  
278 However, our knowledge about the role of AhR in embryo differentiation is still very  
279 limited, in particular with respect to the molecular intermediates that, been dependent on  
280 AhR, may be involved. This encouraged us to investigate the role of AhR in ESCs  
281 differentiation *in vivo* during mouse preimplantation embryonic development. In this  
282 phase of embryogenesis, totipotent blastomeres generate the first three cell lineages of  
283 the embryo: trophectoderm, epiblast and primitive endoderm. Mouse embryogenesis has  
284 been widely studied to understand developmental processes in mammals, but it also  
285 constitutes an excellent model to study the plasticity of stem cells. Understanding how  
286 molecular intermediates govern the balance between pluripotency and differentiation in  
287 blastocyst development allows us to understand stem cell behavior in other physiological  
288 and pathological conditions. An important finding of this study is that AhR affects the  
289 differentiation processes of embryo development by interacting with different signaling  
290 networks.

291 As cleavage of the early zygote takes place, central pluripotency factors increase  
292 their expression to produce totipotent cells that will proliferate and differentiate to  
293 generate a complete organism. We have first found that zygotes from *AhR*<sup>-/-</sup> mice have  
294 basal overexpression of well-known pluripotency factors *Oct4*, *Nanog* and *Sox2*, in  
295 agreement with our previous studies showing that AhR-null mice have an increased  
296 ability to regenerate lung (Morales-Hernandez et al., 2017) and liver (Moreno-Marin et  
297 al., 2017) and a higher potential to sustain undifferentiation of human embryonic

298 carcinoma cells (Morales-Hernandez et al., 2016). The apparent global role of AhR in  
299 controlling differentiation was also reported by its ability to regulate ovarian follicular  
300 development through piRNA-associated proteins, piRNAs and retrotransposons (Rico-  
301 Leo et al., 2016).

302 Pluripotency genes need to reach a certain expression level to activate the  
303 networks that control pluripotency. Interestingly, *Oct4*, *Nanog* and *Sox2* reached their  
304 highest expression levels in a transient manner in 1-cell and 2-cell *AhR*<sup>-/-</sup> embryos,  
305 suggesting that their atypical upregulation very early in development could affect proper  
306 embryo differentiation and contribute to the deficient ability of *AhR*<sup>-/-</sup> mice to sustain  
307 implantation and in-utero survival (Abbott et al., 1999; Fernandez-Salguero et al., 1995;  
308 Peters and Wiley, 1995). The pro-differentiation role of AhR in embryogenesis is also  
309 supported by its own regulation during the process. AhR levels increased with  
310 differentiation and, interestingly, its location was mainly restricted to the blastomeres that  
311 differentiate to form the trophoectoderm, indicating that AhR may exert a differential  
312 regulatory function limiting pluripotency in those blastomeres that will generate  
313 extraembryonic tissues. In this sense, a central regulator such as OCT4, showed an  
314 opposite expression pattern to that of AhR, again supporting its repressive role in  
315 pluripotency. The crosstalk between OCT4 and AhR has been also suggested from studies  
316 using stem-like cancer cells which proposed a reciprocal suppression between AhR and  
317 such pluripotency factor (Cheng et al., 2015; Song et al., 2002).

318 In the morulae, it is known that the first asymmetric division is determinant for  
319 embryonic differentiation, and that in the formed blastocyst a second differentiating wave  
320 gives rise to two types of cells in the ICM. The fact that AhR expression was modulated  
321 during these processes, together with previous studies that link embryo differentiation to  
322 the Hippo pathway, lead us to think that AhR could act through Hippo in the phenotype

323 observed. Our preliminary data indicate that nuclear YAP levels can be modulated by  
324 AhR producing a more differentiated status in NTERA-2 cells (Morales-Hernández et al.,  
325 unpublished results). In this work, we have shown that TE cell fate seems to be activated  
326 by nuclear YAP in an AhR-dependent manner, and thus, AhR and YAP co-localized in  
327 the nucleus of external blastomeres eventually differentiating to the trophectoderm  
328 lineage. The fact that AhR-null blastocysts had OCT4 expression but lacked nuclear YAP  
329 in external blastomeres, suggest that AhR deficiency may result in a failure to link polarity  
330 to transcription factors that lead to differentiation through Hippo signalling.

331 One characteristic of pluripotent cells is their low levels of oxidative  
332 phosphorylation and their preferred glycolytic ATP synthesis. Up-regulation of glycolysis  
333 precedes the reactivation of pluripotent markers (Shyh-Chang et al., 2013). The  
334 differences that we have observed in differentiation markers through embryo  
335 development were correlated with their metabolic status. Lack of AhR reduced  
336 mitochondrial activity and maintained a predominant glycolytic metabolism. During  
337 differentiation, metabolic pathways are modulated according to the needs of the embryo.  
338 Our results are in agreement with those hypothesis since *AhR*<sup>-/-</sup> embryos overexpressed  
339 threonine dehydrogenase (TDH), which is an enzyme responsible for providing  
340 metabolites generated from Thr that are specifically used for stem cell self-renewal.  
341 Therefore, lack of AhR probably causes a metabolic state in the embryos that corresponds  
342 to a lower differentiation state. In summary, AhR has relevant functions in embryonic  
343 development adjusting the expression of signaling pathways that control pluripotency and  
344 differentiation. Under low AhR levels, a defective differentiation status may compromise  
345 completion of the embryo developmental program, implantation and survival.

346

347

## 348 **MATERIALS AND METHODS**

### 349 **Embryo collection**

350 C57BL/6N wild-type (*AhR*<sup>+/+</sup>) and AhR-null (*AhR*<sup>-/-</sup>) mice were kept under 12 h  
351 light/dark cycle and had free access to food and water. 4 to 7 weeks old females were  
352 injected with 7.5 IU Pregnant Mare's Serum followed 48 h later by 5 IU i.p. injection of  
353 human chorionic gonadotropin (hCG). Females were sacrificed at the indicated  
354 developmental stages and the oviducts/hemiuterus were collected in PBS and flashed for  
355 embryo collection. Embryos were isolated using a stripper (Origio). All work involving  
356 mice has been performed in accordance with the National and European legislation  
357 (Spanish Royal Decree RD53/2013 and EU Directive 86/609/CEE as modified by  
358 2003/65/CE, respectively) for the protection of animals used for research. Experimental  
359 protocols using mice were approved by the Bioethics Committee for Animal  
360 Experimentation of the University of Extremadura (Registry 109/2014) and by the Junta  
361 de Extremadura (EXP-20160506-1). Mice had free access to water and rodent chow.

### 362 **Gene expression analysis**

363 Total RNA was isolated from mouse embryos using the pico pure RNA isolation Kit  
364 (Thermo Fisher) and purified following the manufacturer's instructions. Reverse  
365 transcription was performed using random priming and the iScript Reverse Transcription  
366 Super Mix (Bio-Rad). Real-time PCR was used to quantify the mRNA expression  
367 of *AhR*, *Nanog*, *Oct4*, *Sox2*, *Lats1*, *Lats2*,  *$\beta$ -catenin*, *Scl2a1*, *Scl2a2*, *Hexokinase*, *Cdx2*,  
368 *Gata3*, *TDH*. Reactions were done using Luna Master Mix (New England Biolabs) in a  
369 step one thermal cycler (Applied Biosystems) essentially as described (Rey-Barroso et  
370 al., 2013). The expression of  *$\beta$ -Actin* was used to normalize gene expression ( $\Delta$ Ct) and  
371  $2^{-\Delta\Delta C_t}$  was applied to calculate changes in RNA levels with respect to control conditions.  
372 Primer sequences used are indicated in supplementary Table S1.

373 **Whole mount immunofluorescence**

374 Each embryo group was independently fixed in 3.5% paraformaldehyde for 15 min at  
375 room temperature. The zona pellucida was removed by incubation in Tyrode's acid  
376 solution for 15-20 s at 37°C. Embryos were blocked in PBS containing 1% BSA and 0.1  
377 M glycine for 2.5 h followed incubation in blocking solution with antibodies against  
378 NANOG, OCT4, AhR, YAP, pYAP overnight at 4°C. Following washings, an Alexa-  
379 633, 488 or 550 labeled secondary antibodies was added for 2 h at 4°C. Samples were  
380 further washed and incubated with Hoechst to stain cell nuclei. Embryos were transferred  
381 to Ibidi chambers and analyzed using an Olympus FV1000 confocal microscope.

382 **Magnetic-activated Cell Sorting**

383 Inner cell mass (ICM) and trophectoderm (TE) blastomeres were separated using  
384 concanavalin and MACS microbeads essentially as described (Ozawa and Hansen, 2011).  
385 Blastocysts at 3,5 d.p.c were harvested and incubated in acidic Tyrode's solution to  
386 remove the zona pellucida. Samples were washed three times in MACS buffer [DPBS  
387 with 0.5% (w/v) BSA and 2 mM ethylenediaminetetraacetic acid (EDTA), pH 7.2] and  
388 incubated for 10 min with concanavalin A conjugated-FITC (Sigma-Aldrich, ConA-  
389 FITC, 1 mg/ml in MACS buffer). Following three washes in MACS buffer, blastocysts  
390 were incubated in PBS containing 1 mM EDTA for 5 min followed by incubation in  
391 0.05% (w/v) trypsin-0.53 mM EDTA solution (Invitrogen) for 10 min at 37°C. Groups of  
392 15-20 blastocysts were disaggregated into single blastomeres by pipetting with a stripper  
393 (Origen) under a dissecting microscope. Blastomeres were transferred into PBS  
394 containing 1 mM EDTA and 10% (v/v) fetal bovine serum to stop the reaction. Samples  
395 were then washed in MACS buffer by centrifugation at 500 x g for 5 min and resuspended  
396 in 110 µl of MACS buffer. Disaggregated blastomeres in solution were incubated with 10  
397 µl of magnetic microbeads conjugated to mouse anti-FITC (Miltenyi Biotec) for 15 min



398 on ice. Following two washes by centrifugation at 500 x g for 5 min, samples were  
399 resuspended in 500 µl MACS buffer and passed through MACS separation columns  
400 (Miltenyi Biotec) attached to a magnetic board (Spherotech). The FITC-negative fraction  
401 (ICM) was eluted by three 500 µl MACS buffer washes followed by FITC positive (TE)  
402 elution by removing the MACS separation column from the magnetic board and washing  
403 three times with 500 µl MACS buffer.

#### 404 **TMRM and Mitotracker staining**

405 The embryos were arranged in staining solution made with 10 µL of 100 µM stock  
406 solution Tetramethylrhodamine (Invitrogen) in 10 mL of KSOM medium (EmbriMax,  
407 Millipore) or 100 nM of Mitotracker green (Cell Signalling). Embryos were placed in  
408 IBIDI plates in a 5% CO<sub>2</sub> incubator at 37°C for 30 min for TMRM staining and 20 min  
409 for mitotracker. Then, embryos were washed in PBS twice and analyzed by confocal  
410 microscopy.

#### 411 **Mitochondrial potential measurement using the JC10 Kit**

412 Pools of 25 embryos were placed in a 96 plate well, and processed following the non-  
413 adherent cell protocol recommended by the manufacturer. An aliquot of 50 µl of JC-10  
414 dye loading solution was added per well and the embryos were incubated in a 5% CO<sub>2</sub>  
415 incubator at 37 °C for 30 min. Then, 50 µl of assay buffer were added and fluorescence  
416 intensity was monitored in a fluorescence multiwell plate reader using excitation  
417 wavelength 490 nm and emission wavelength 525 nm. For ratio analysis, signals were  
418 also recorded at excitation wavelength 540 nm and emission wavelength 590 nm. The  
419 red/green fluorescence intensity ratio was used to determine the mitochondrial membrane  
420 potential (MMP).

421

422

423 **Hexokinase activity measurement**

424 Groups of 20 blastocysts were disaggregated by incubation in 0.05% (w/v) trypsin  
425 solution containing 0.53 mM EDTA for 10 min at 37°C. Samples were centrifuged,  
426 washed twice in PBS containing 1 mM EDTA and 10% (v/v) fetal bovine serum and once  
427 in PBS. Single blastomeres were resuspended in hexokinase (HK) assay buffer and  
428 homogenized through passage by a 30 g syringe. Homogenized samples were used in the  
429 pico-probe Hexokinase activity assay kit (Biovision) following manufacturer's  
430 indications.

431 **Statistical analyses**

432 GraphPad Prism 6.0 software (GraphPad) was used to perform comparison between  
433 experimental conditions. Student's t-test (unpaired two-sided) was used to analyze  
434 differences between two experimental groups. For three or more experimental conditions  
435 data was analyzed using ANOVA. Data are shown as mean  $\pm$  SD. Differences were  
436 considered significant at  $p^* < 0.05$ ;  $p^{**} < 0.01$ ;  $p^{***} < 0.001$ . Data analyses are indicated in  
437 the Figure Legends.

438

439

440

441

442

443

444

445

446

447

448 **ACKNOWLEDGMENTS**

449 The Servicio de Técnicas Aplicadas a las Biociencias (STAB) of the Universidad de  
450 Extremadura are greatly acknowledged for their technical support.

451

452 **COMPETING INTERESTS**

453 The authors declare no conflicts of interest

454

455 **FUNDING**

456 This work was supported by grants to P.M.F-S. from the Ministerio de Economía y  
457 Competitividad (SAF2017-82597-R) and Junta de Extremadura (GR18006 and  
458 IB160210). A.N.P. was supported by the Spanish Ministry of Science, Innovation and  
459 University. Spanish funding is co-sponsored by the European Union FEDER program.

460

461

462

463

464

465

466

467

468

469

470 **REFERENCES**

- 471 Abbott, B.D., Schmid, J.E., Pitt, J.A., Buckalew, A.R., Wood, C.R., Held, G.A., and  
472 Diliberto, J.J. (1999). Adverse reproductive outcomes in the transgenic Ah receptor-  
473 deficient mouse. *Toxicol. Appl. Pharmacol.* *155*, 62-70.
- 474 Artus, J., Piliszek, A., and Hadjantonakis, A.K. (2011). The primitive endoderm lineage  
475 of the mouse blastocyst: sequential transcription factor activation and regulation of  
476 differentiation by Sox17. *Dev. Biol.* *350*, 393-404.
- 477 Bedzhov, I., Graham, S.J., Leung, C.Y., and Zernicka-Goetz, M. (2014). Developmental  
478 plasticity, cell fate specification and morphogenesis in the early mouse embryo.  
479 *Philosophical Transactions of the Royal Society B: Biological Sciences* *369*, 20130538.
- 480 Boyer, L.A., Lee, T.I., Cole, M.F., Johnstone, S.E., Levine, S.S., Zucker, J.P., Guenther,  
481 M.G., Kumar, R.M., Murray, H.L., Jenner, R.G., et al. (2005). Core transcriptional  
482 regulatory circuitry in human embryonic stem cells. *Cell* *122*, 947-956.
- 483 Boyer, L.A., Mathur, D., and Jaenisch, R. (2006). Molecular control of pluripotency.  
484 *Curr. Opin. Genet. Dev.* *16*, 455-462.
- 485 Chazaud, C., and Yamanaka, Y. (2016). Lineage specification in the mouse  
486 preimplantation embryo. *Development* *143*, 1063-1074.
- 487 Cheng, J., Li, W., Kang, B., Zhou, Y., Song, J., Dan, S., Yang, Y., Zhang, X., Li, J., and  
488 Yin, S. (2015). Tryptophan derivatives regulate the transcription of Oct4 in stem-like  
489 cancer cells. *Nature communications* *6*, 7209.
- 490 Fernandez-Salguero, P., Pineau, T., Hilbert, D.M., McPhail, T., Lee, S.S., Kimura, S.,  
491 Nebert, D.W., Rudikoff, S., Ward, J.M., and Gonzalez, F.J. (1995). Immune system  
492 impairment and hepatic fibrosis in mice lacking the dioxin-binding Ah receptor. *Science*  
493 *268*, 722-726.

- 494 Fleming, T.P. (1987). A quantitative analysis of cell allocation to trophectoderm and inner  
495 cell mass in the mouse blastocyst. *Developmental biology* *119*, 520-531.
- 496 Frum, T., and Ralston, A. (2015). Cell signaling and transcription factors regulating cell  
497 fate during formation of the mouse blastocyst. *Trends Genet.* *31*, 402-410.
- 498 Johnson, M.H., and Ziomek, C.A. (1981). The foundation of two distinct cell lineages  
499 within the mouse morula. *Cell* *24*, 71-80.
- 500 Ko, C.I., and Puga, A. (2017). Does the Aryl Hydrocarbon Receptor Regulate  
501 Pluripotency? *Curr Opin Toxicol* *2*, 1-7.
- 502 Laiosa, M.D., Tate, E.R., Ahrenhoerster, L.S., Chen, Y., and Wang, D. (2015). Effects of  
503 Developmental Activation of the Aryl Hydrocarbon Receptor by 2,3,7,8-  
504 Tetrachlorodibenzo--dioxin on Long-Term Self-Renewal of Murine Hematopoietic Stem  
505 Cells. *Environ. Health Perspect.*
- 506 Leung, C.Y., and Zernicka-Goetz, M. (2013). Angiotin prevents pluripotent lineage  
507 differentiation in mouse embryos via Hippo pathway-dependent and-independent  
508 mechanisms. *Nature communications* *4*, 2251.
- 509 Manzanares, M., and Rodriguez, T.A. (2013). Development: Hippo signalling turns the  
510 embryo inside out. *Current Biology* *23*, R559-R561.
- 511 Morales-Hernandez, A., Gonzalez-Rico, F.J., Roman, A.C., Rico-Leo, E., Alvarez-  
512 Barrientos, A., Sanchez, L., Macia, A., Heras, S.R., Garcia-Perez, J.L., Merino, J.M., et  
513 al. (2016). Alu retrotransposons promote differentiation of human carcinoma cells  
514 through the aryl hydrocarbon receptor. *Nucleic Acids Res* *44*, 4665-4683.
- 515 Morales-Hernandez, A., Nacarino-Palma, A., Moreno-Marin, N., Barrasa, E., Paniagua-  
516 Quinones, B., Catalina-Fernandez, I., Alvarez-Barrientos, A., Bustelo, X.R., Merino,  
517 J.M., and Fernandez-Salguero, P.M. (2017). Lung regeneration after toxic injury is  
518 improved in absence of dioxin receptor. *Stem Cell Res* *25*, 61-71.

519 Moreno-Marin, N., Barrasa, E., Morales-Hernandez, A., Paniagua, B., Blanco-Fernandez,  
520 G., Merino, J.M., and Fernandez-Salguero, P.M. (2017). Dioxin Receptor Adjusts Liver  
521 Regeneration After Acute Toxic Injury and Protects Against Liver Carcinogenesis. *Sci*  
522 *Rep* 7, 10420.

523 Morris, S.A., Teo, R.T., Li, H., Robson, P., Glover, D.M., and Zernicka-Goetz, M. (2010).  
524 Origin and formation of the first two distinct cell types of the inner cell mass in the mouse  
525 embryo. *Proceedings of the National Academy of Sciences* 107, 6364-6369.

526 Mulero-Navarro, S., and Fernandez-Salguero, P.M. (2016). New Trends in Aryl  
527 Hydrocarbon Receptor Biology. *Front Cell Dev Biol* 4, 45.

528 Ozawa, M., and Hansen, P.J. (2011). A novel method for purification of inner cell mass  
529 and trophectoderm cells from blastocysts using magnetic activated cell sorting. *Fertility*  
530 *and sterility* 95, 799-802.

531 Paramasivam, M., Sarkeshik, A., Yates III, J.R., Fernandes, M.J., and McCollum, D.  
532 (2011). Angiomotin family proteins are novel activators of the LATS2 kinase tumor  
533 suppressor. *Molecular biology of the cell* 22, 3725-3733.

534 Peters, J.M., and Wiley, L.M. (1995). Evidence that murine preimplantation embryos  
535 express aryl hydrocarbon receptor. *Toxicol. Appl. Pharmacol.* 134, 214-221.

536 Rey-Barroso, J., Colo, G.P., Alvarez-Barrientos, A., Redondo-Munoz, J., Carvajal-  
537 Gonzalez, J.M., Mulero-Navarro, S., Garcia-Pardo, A., Teixido, J., and Fernandez-  
538 Salguero, P.M. (2013). The dioxin receptor controls beta1 integrin activation in  
539 fibroblasts through a Cbp-Csk-*Src* pathway. *Cell Signal* 25, 848-859.

540 Rico-Leo, E.M., Moreno-Marin, N., Gonzalez-Rico, F.J., Barrasa, E., Ortega-Ferrusola,  
541 C., Martin-Munoz, P., Sanchez-Guardado, L.O., Llano, E., Alvarez-Barrientos, A.,  
542 Infante-Campos, A., et al. (2016). piRNA-associated proteins and retrotransposons are

543 differentially expressed in murine testis and ovary of aryl hydrocarbon receptor deficient  
544 mice. *Open Biol* 6.

545 Roman, A.C., Carvajal-Gonzalez, J.M., Merino, J.M., Mulero-Navarro, S., and  
546 Fernandez-Salguero, P.M. (2018). The aryl hydrocarbon receptor in the crossroad of  
547 signalling networks with therapeutic value. *Pharmacol. Ther.* 185, 50-63.

548 Shyh-Chang, N., Daley, G.Q., and Cantley, L.C. (2013). Stem cell metabolism in tissue  
549 development and aging. *Development* 140, 2535-2547.

550 Song, J., Clagett-Dame, M., Peterson, R.E., Hahn, M.E., Westler, W.M., Sicinski, R.R.,  
551 and DeLuca, H.F. (2002). A ligand for the aryl hydrocarbon receptor isolated from lung.  
552 *Proceedings of the National Academy of Sciences* 99, 14694-14699.

553 Wang, J., Alexander, P., Wu, L., Hammer, R., Cleaver, O., and McKnight, S.L. (2009).  
554 Dependence of mouse embryonic stem cells on threonine catabolism. *Science* 325, 435-  
555 439.

556 Wang, Q., Kurita, H., Carreira, V., Ko, C.I., Fan, Y., Zhang, X., Biesiada, J., Medvedovic,  
557 M., and Puga, A. (2016). Ah Receptor Activation by Dioxin Disrupts Activin, BMP, and  
558 WNT Signals During the Early Differentiation of Mouse Embryonic Stem Cells and  
559 Inhibits Cardiomyocyte Functions. *Toxicol Sci* 149, 346-357.

560

561

562

563

564

565

566 **FIGURES LEGENDS**

567 **Figure 1. AhR expression increases during embryo differentiation. (A)**

568 Immunofluorescence analysis of AhR at the indicated embryonic stages. Whole *AhR*<sup>+/+</sup>  
569 embryos were stained using a specific AhR antibody. Hoechst staining was used to label  
570 the cell nucleus. Confocal microscopy was used for detection. **(B)** Immunofluorescence  
571 was quantified by calculating the mean fluorescence intensity (MFI) for each  
572 developmental stage. **(C)** *AhR* mRNA expression was quantified by RT-qPCR using RNA  
573 purified from TE or ICM fractions previously separated by MACS. **(D)** *AhR* mRNA  
574 expression was quantified by RT-qPCR in *AhR*<sup>+/+</sup> embryos at the indicated  
575 developmental stages using total RNA and the specific primers indicated in  
576 Supplementary Table S1. RT-qPCR was normalized by the expression of *β-Actin* and  
577 represented as  $2^{-\Delta\Delta Ct}$ . \**p* < 0.05; \*\**p* < 0.01. Data are shown as mean ± SD.

578 **Figure 2. Pluripotency factors are upregulated in AhR-null embryos. (A-C)**

579 *AhR*<sup>+/+</sup> and *AhR*<sup>-/-</sup> embryos were obtained at the indicated embryonic stages and used  
580 to quantify the mRNA expression of *Nanog* **(A)**, *Oct4* **(B)**, and *Sox2* **(C)** by RT-qPCR.  
581 Expression levels were normalized by *β-Actin* and represented as  $2^{-\Delta\Delta Ct}$ . \**p* < 0.05; \*\**p* <  
582 0.01. Data are shown as mean ± SD.

583 **Figure 3. AhR depletion alters OCT4 cellular distribution through embryogenesis.**

584 **(A)** Immunofluorescence analysis of OCT4 at the indicated embryonic stages. Whole  
585 embryos were stained using a specific antibody. Hoechst was used to stain cell nuclei.  
586 **(B)** *Oct4* mRNA expression was quantified by RT-qPCR using mRNA purified from TE  
587 and ICM fractions separated by MACS using the specific primers indicated in  
588 Supplementary Table S1. **(C)** Immunofluorescence analysis of OCT4 (green) and AhR  
589 (red) in embryos at the blastocyst stage. mRNA expression was normalized by *β-*



590 *Actin* and represented as  $2^{-\Delta\Delta Ct}$ . \*\* $p < 0.01$ . Data are shown as mean  $\pm$  SD. Confocal  
591 microscopy was used for detection .

592 **Figure 4. NANOG distribution in the embryo is altered in absence of AhR. (A)**

593 Immunofluorescence analysis of NANOG at the indicated embryonic stages. Whole  
594 embryos were stained using a specific antibody. Hoechst was used for staining cell nuclei.

595 **(B)** Immunofluorescence was quantified by calculating the mean fluorescence intensity

596 (MFI). \*\* $p < 0.01$ ; \*\*\* $p < 0.001$ . Data are shown as mean  $\pm$  SD.

597 **Figure 5. AhR deficiency alters localization of the Hippo effector YAP.**

598 Immunofluorescence analysis of YAP and pYAP at the indicated developmental stages

599 in *AhR*<sup>+/+</sup> and *AhR*<sup>-/-</sup> embryos **(A,B)**. Whole embryos were stained using specific

600 antibodies for YAP **(A)** or phosphor-YAP **(B)**. Hoechst was used for staining of cell

601 nucleus. Confocal microscopy was used for detection.

602 **Figure 6. Hippo effectors and molecular intermediates of pluripotency are altered**

603 **in absence of AhR. (A)** Levels of pYAP were quantified from immunofluorescences and

604 represented as the mean fluorescence intensity (MFI). **(B)** Nuclear YAP levels in morulae

605 and blastocysts from *AhR*<sup>+/+</sup> and *AhR*<sup>-/-</sup> mice was quantified by immunofluorescence

606 and represented as the mean fluorescence intensity (MFI). *AhR*<sup>+/+</sup> and *AhR*<sup>-/-</sup> embryos

607 at the indicated developmental stages were used to purify embryo mRNA **(C-G, J)** or

608 mRNA from TE and ICM fractions **(H,I)** that were separated by MACS as indicated in

609 Material and Methods. The expression of *Lats1* **(C)**, *Lats2* **(D)**,  $\beta$ -*Catenin* **(E)**, *Sox17* **(F)**,

610 *Cdx2* **(G-I)** and *Gata3* **(J)** was quantified by RT-qPCR. Expression levels were

611 normalized by  $\beta$ -*Actin* and represented as  $2^{-\Delta\Delta Ct}$ . \* $p < 0.05$ ; \*\* $p < 0.01$ ; \*\*\* $p < 0.001$ . Data

612 are shown as mean  $\pm$  SD.

613 **Figure 7. AhR lacking embryos have lower mitochondrial activity.** Mitochondrial

614 membrane potential was measured by TMRM staining at the indicated stages and then

615 analyzed by confocal microscopy. Three embryos per genotype were analyzed (**A,B**).  
616 Mitochondrial membrane potential was determined by JC10 staining in pools of 15-20  
617 embryos (**C**). Mitochondrial volume was analyzed by mitotracker green staining and  
618 visualized by confocal microscopy (**D**). Mitochondrial carrier homolog-1 (*Mtch1*) mRNA  
619 expression was measured in blastocysts from each genotype. quantified by RT-qPCR.  
620 Expression levels were normalized by  $\beta$ -Actin and represented as  $2^{-\Delta\Delta Ct}$ . \* $p < 0.05$ ; \*\* $p <$   
621  $0.01$ ; \*\*\* $p < 0.001$ . Data are shown as mean  $\pm$  SD.

622 **Figure 8. AhR depletion favors a glycolytic metabolism.** mRNA was purified from  
623 *AhR*<sup>+/+</sup> and *AhR*<sup>-/-</sup> blastocysts and the expression of Hexokinase-*HK* (**A**), *Scl2a1* (**B**)  
624 and *Scl2a3* (**C**) was quantified by RT-qPCR. Expression levels were normalized by  $\beta$ -  
625 *Actin* and represented as  $2^{-\Delta\Delta Ct}$ . (**D**) Hexokinase activity was measured using pools of 25-  
626 30 embryos at the morulae to blastocyst stages by an enzymatic assay (**E**). Threonine  
627 dehydrogenase expression was analyzed at the indicated developmental stages in *AhR*<sup>+/+</sup>  
628 and *AhR*<sup>-/-</sup> embryos. \* $p < 0.05$ ; \*\* $p < 0.01$ ; \*\*\* $p < 0.001$ . Data are shown as mean  $\pm$  SD.  
629

**A**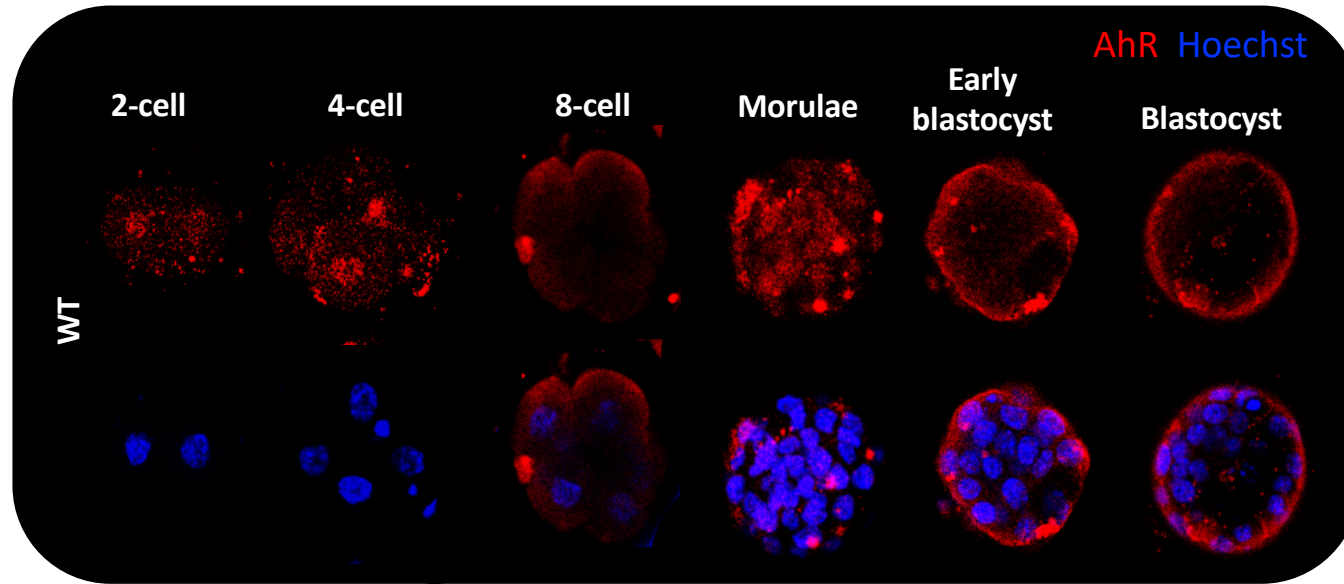**FIGURE 1**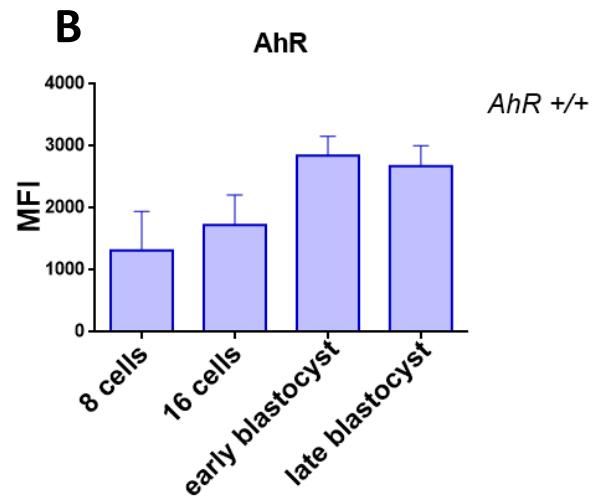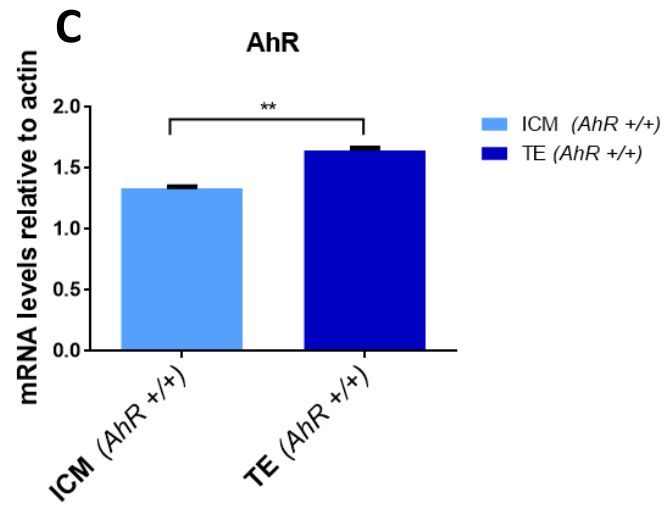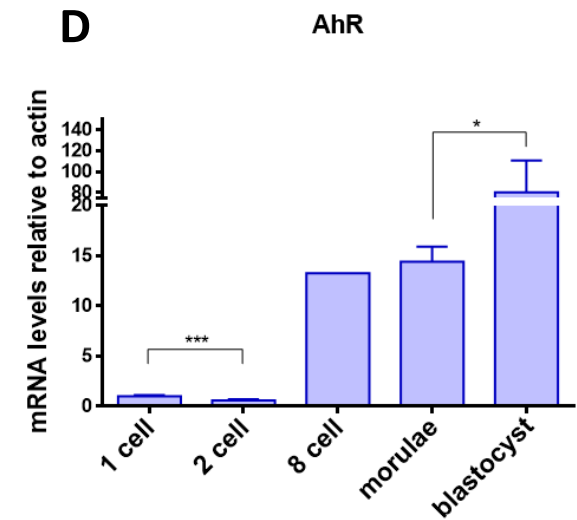

FIGURE 2

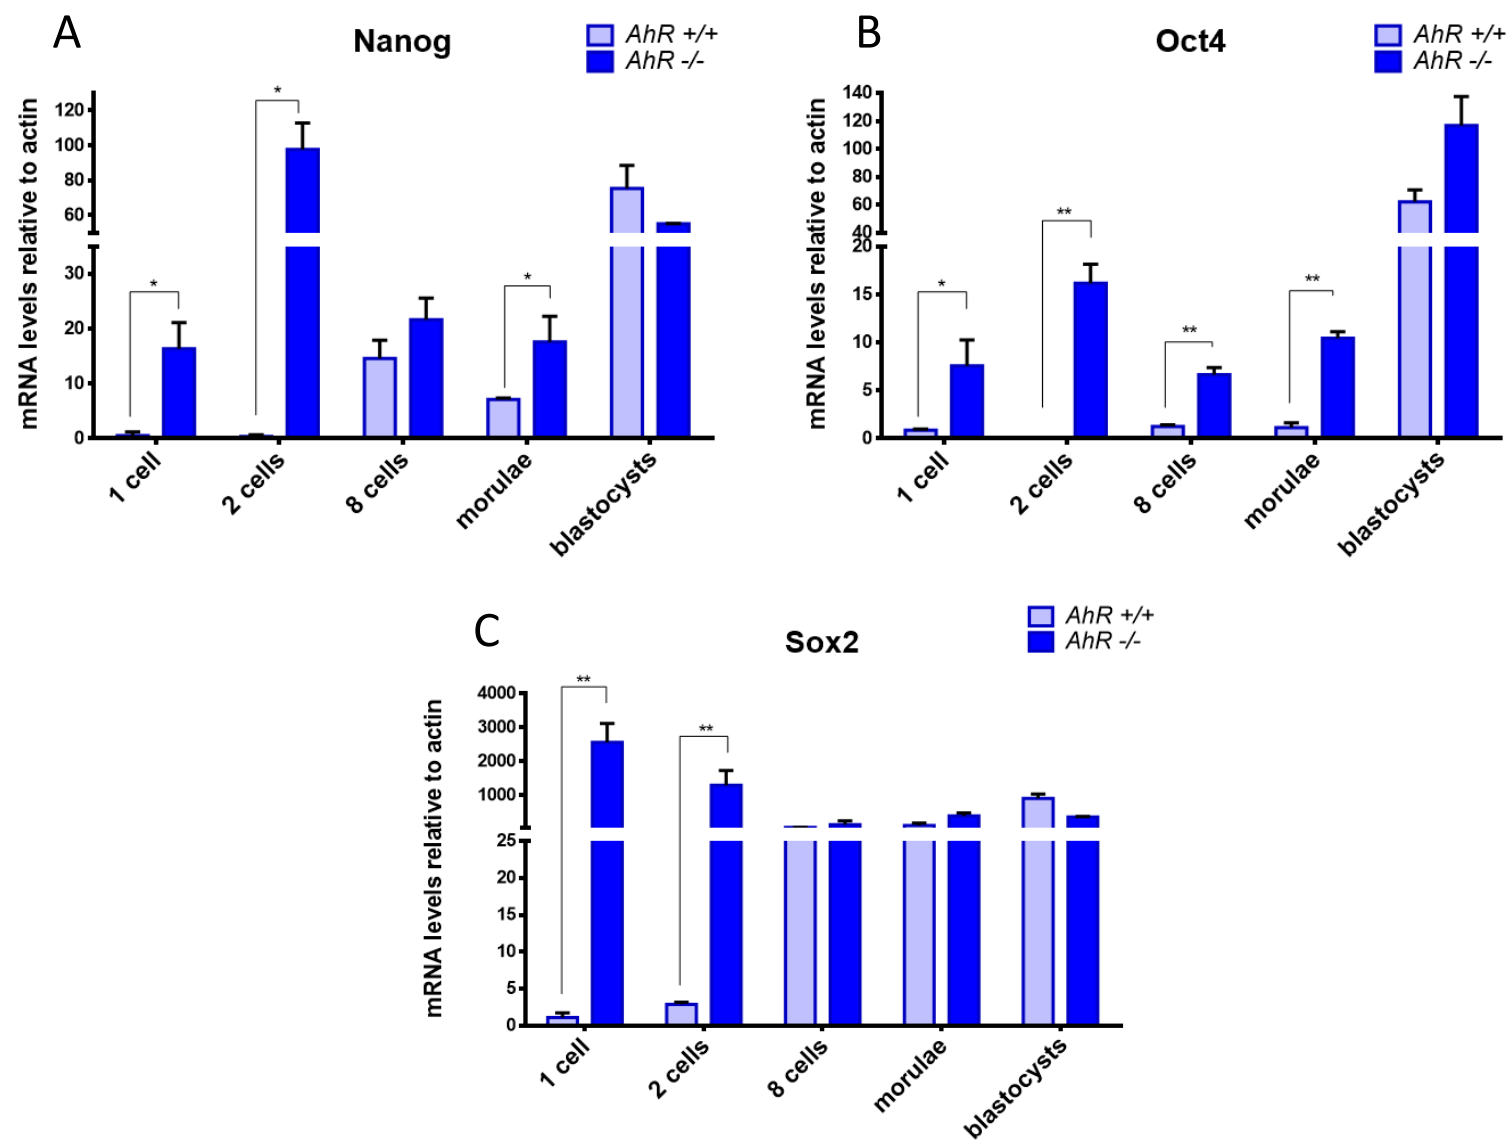

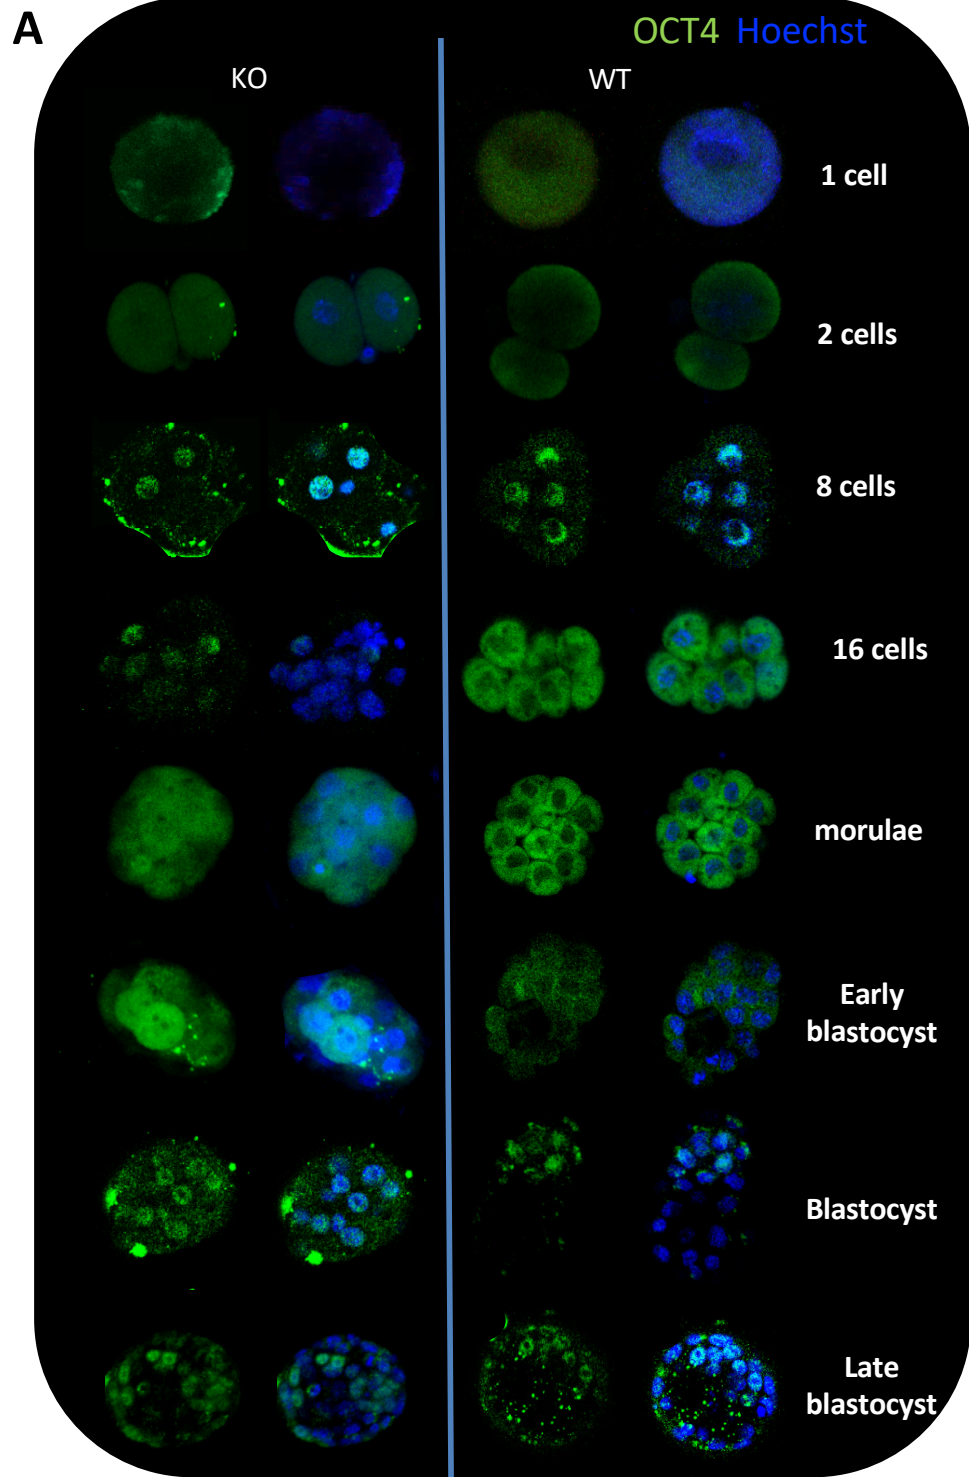

**FIGURE 3**

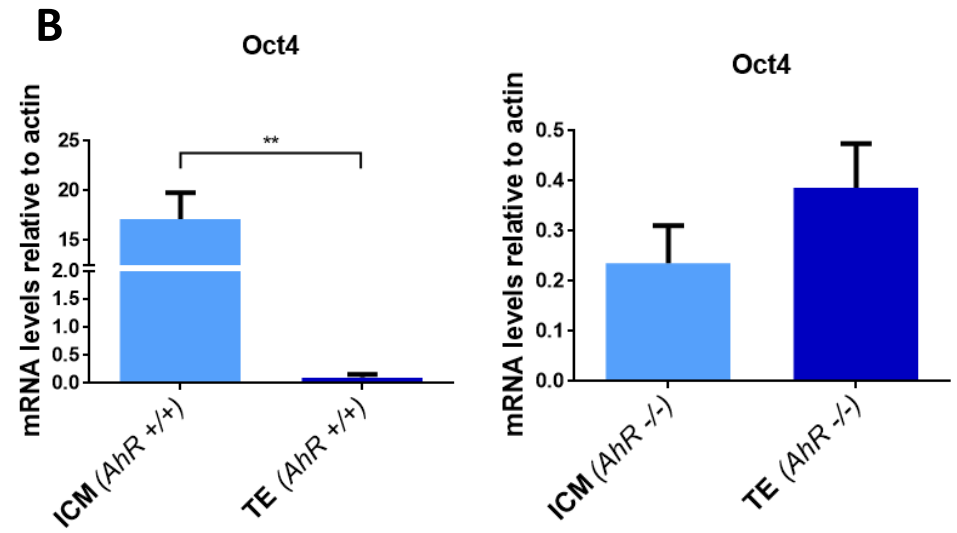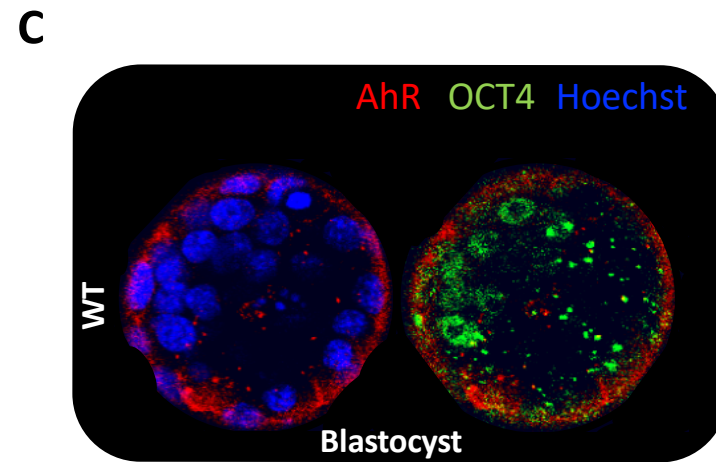

**A**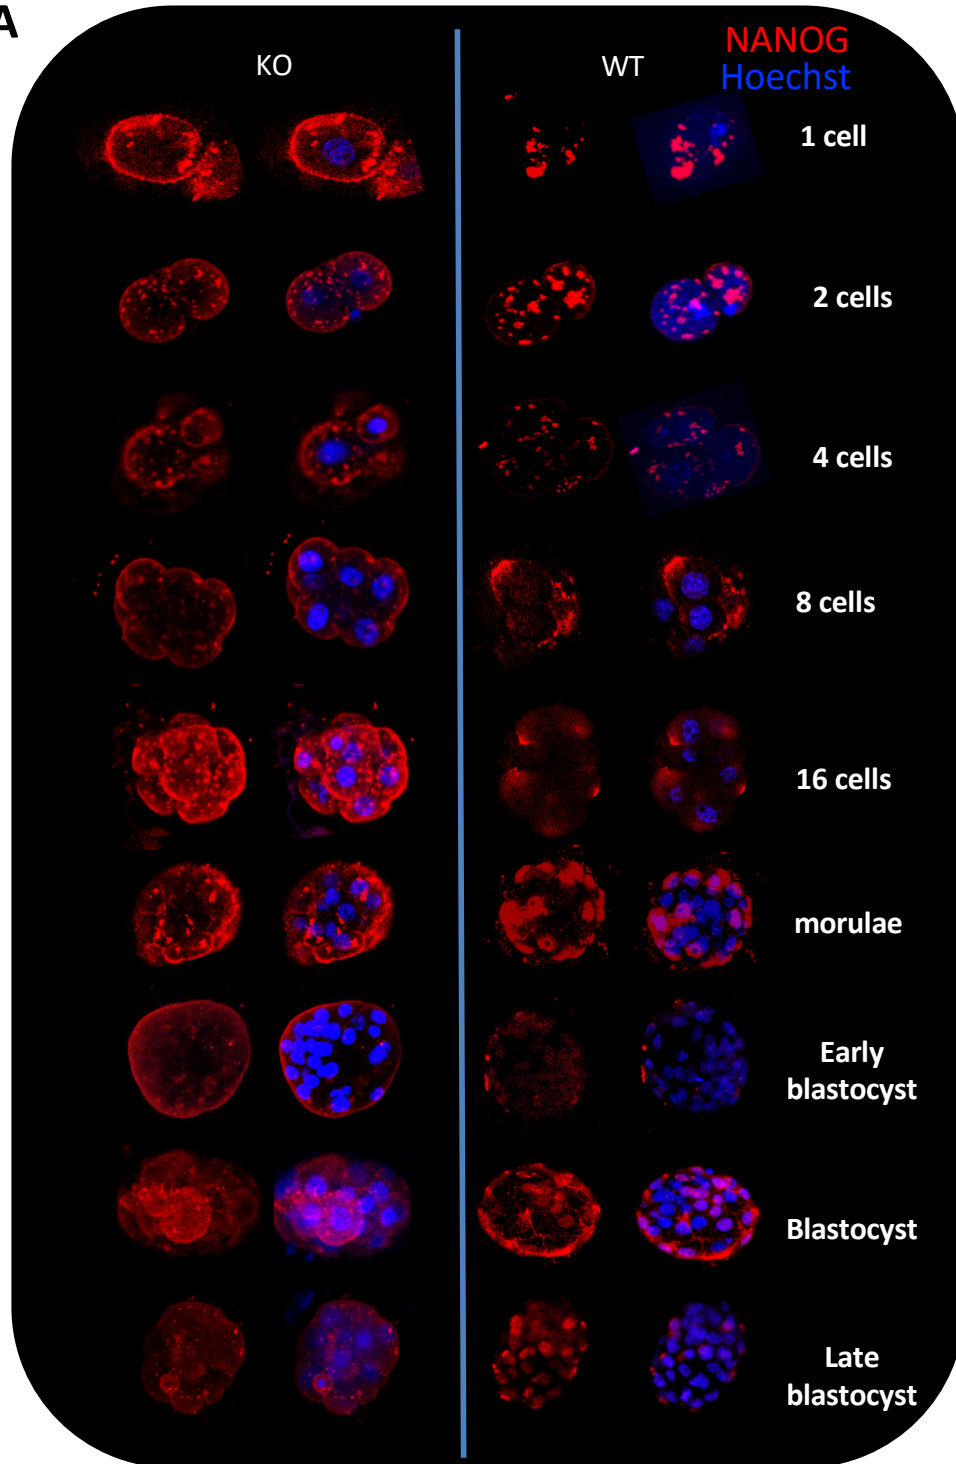**FIGURE 4****B**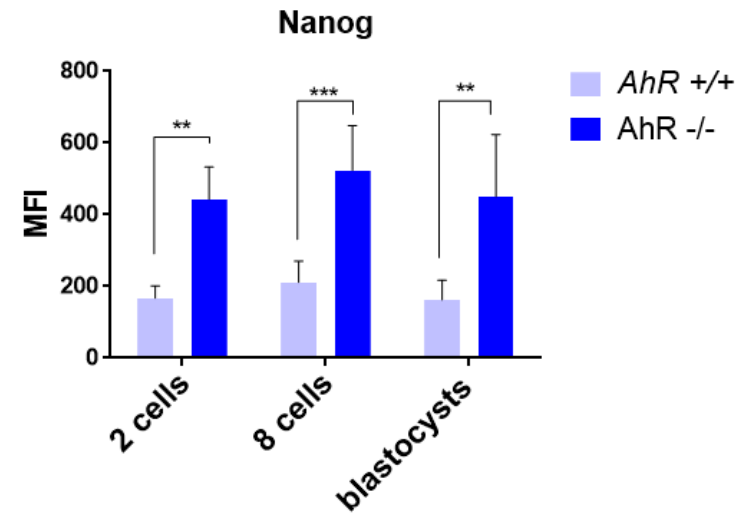

FIGURE 5

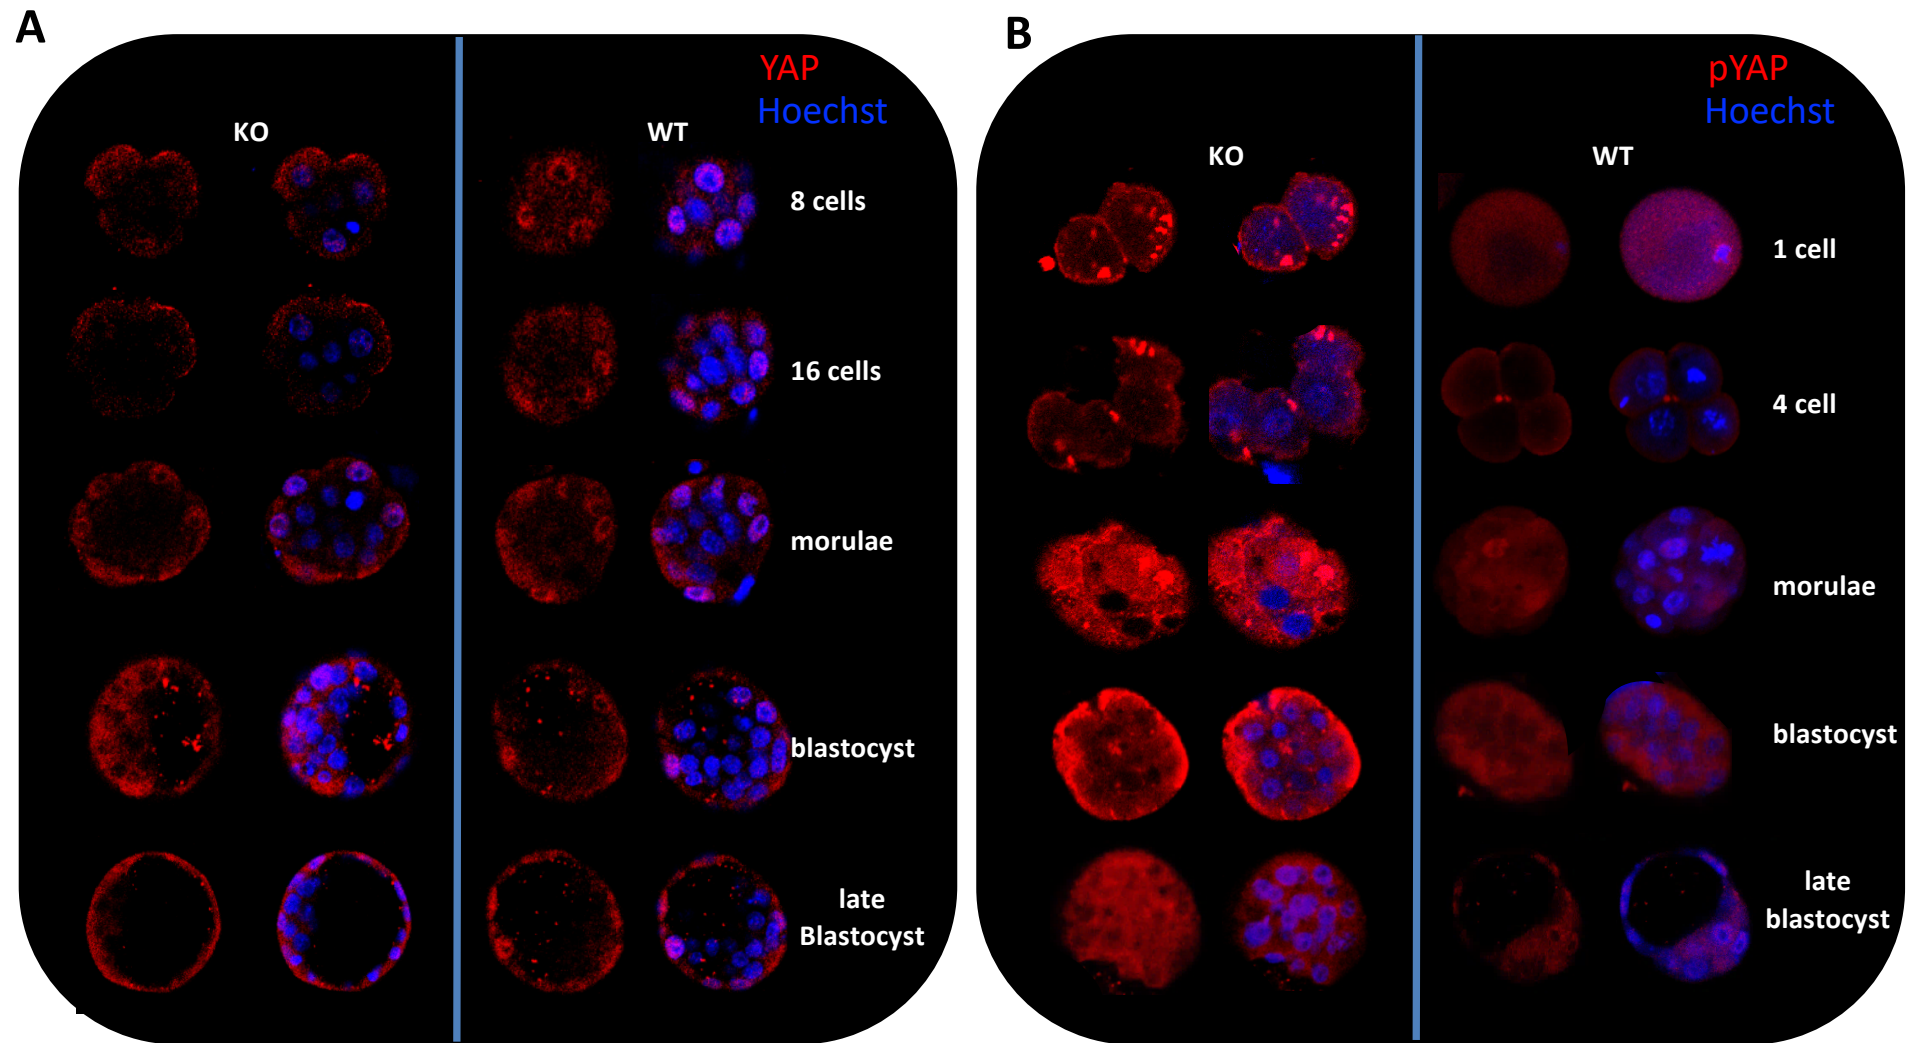

**FIGURE 6**

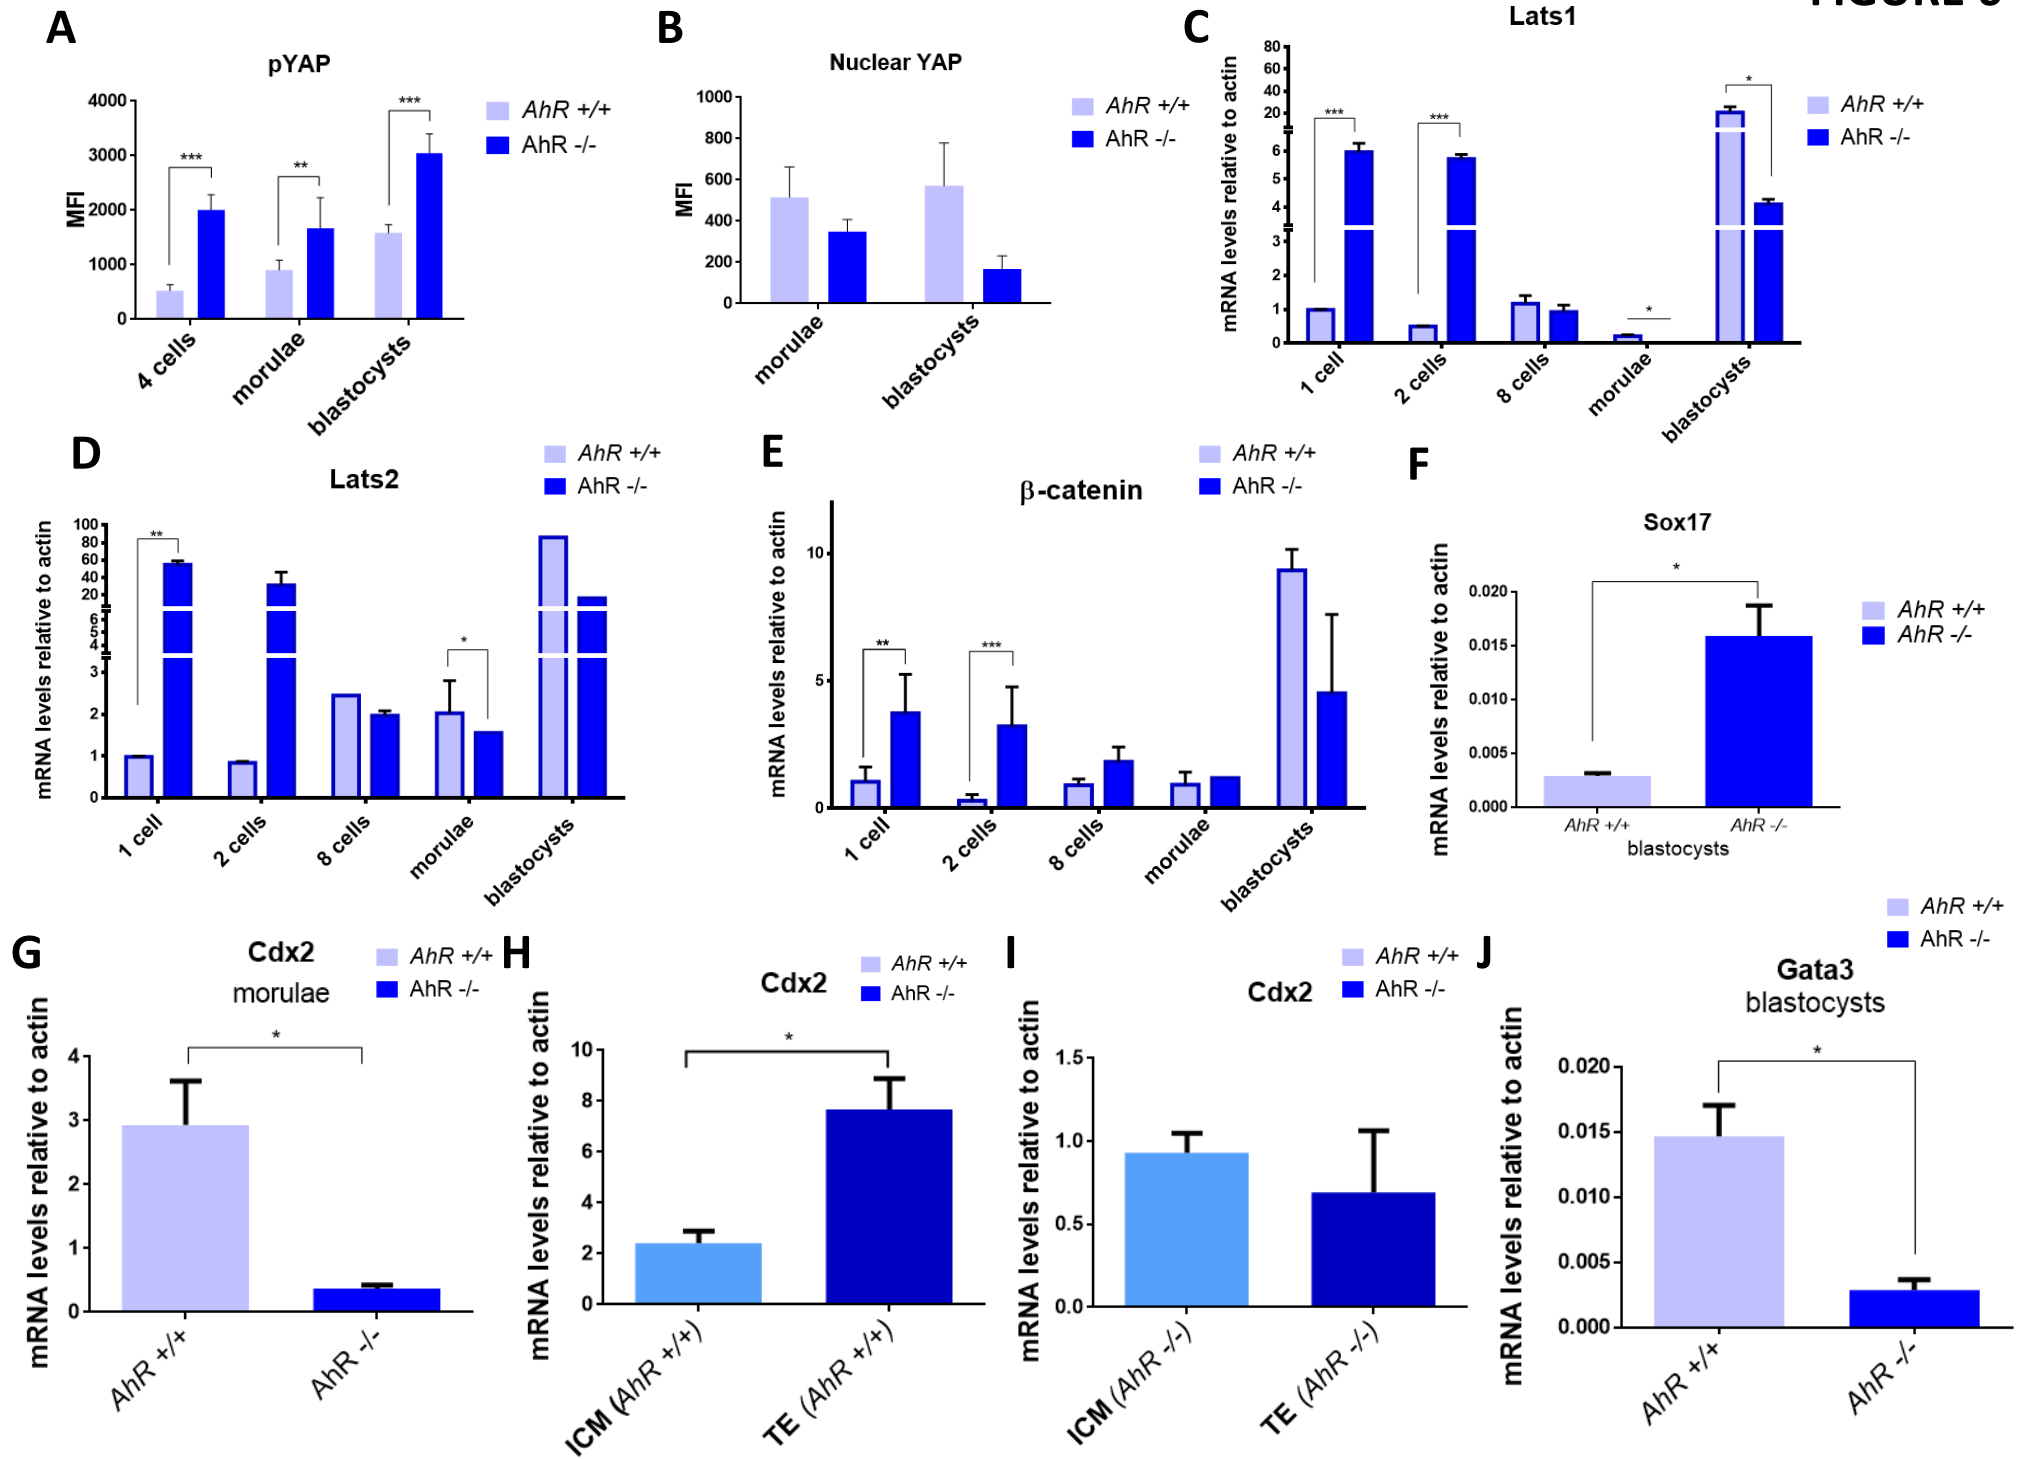



**FIGURE 7**

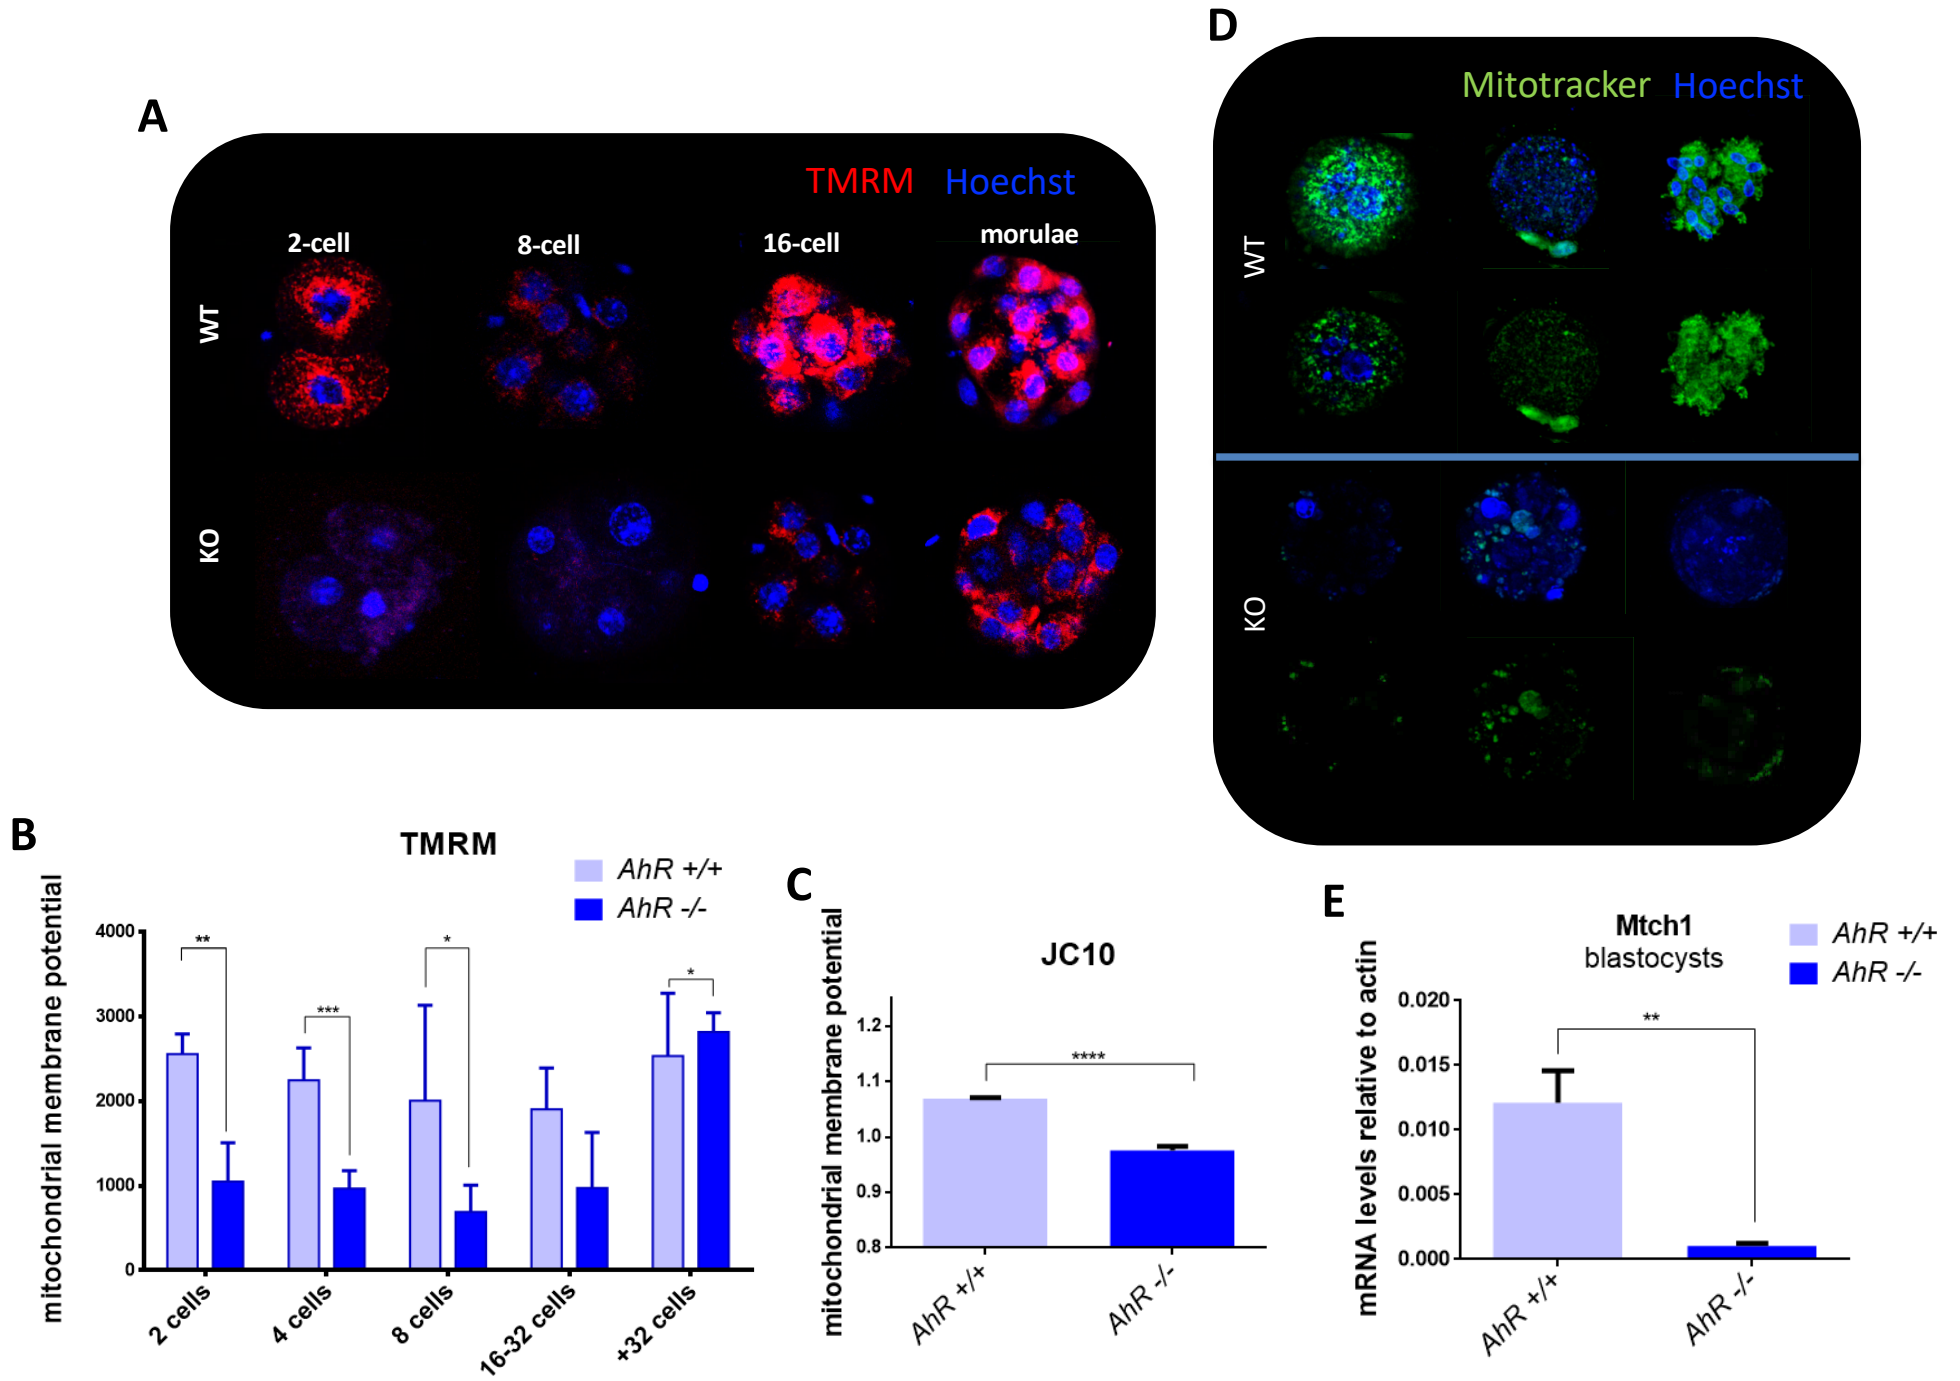

**FIGURE 8**

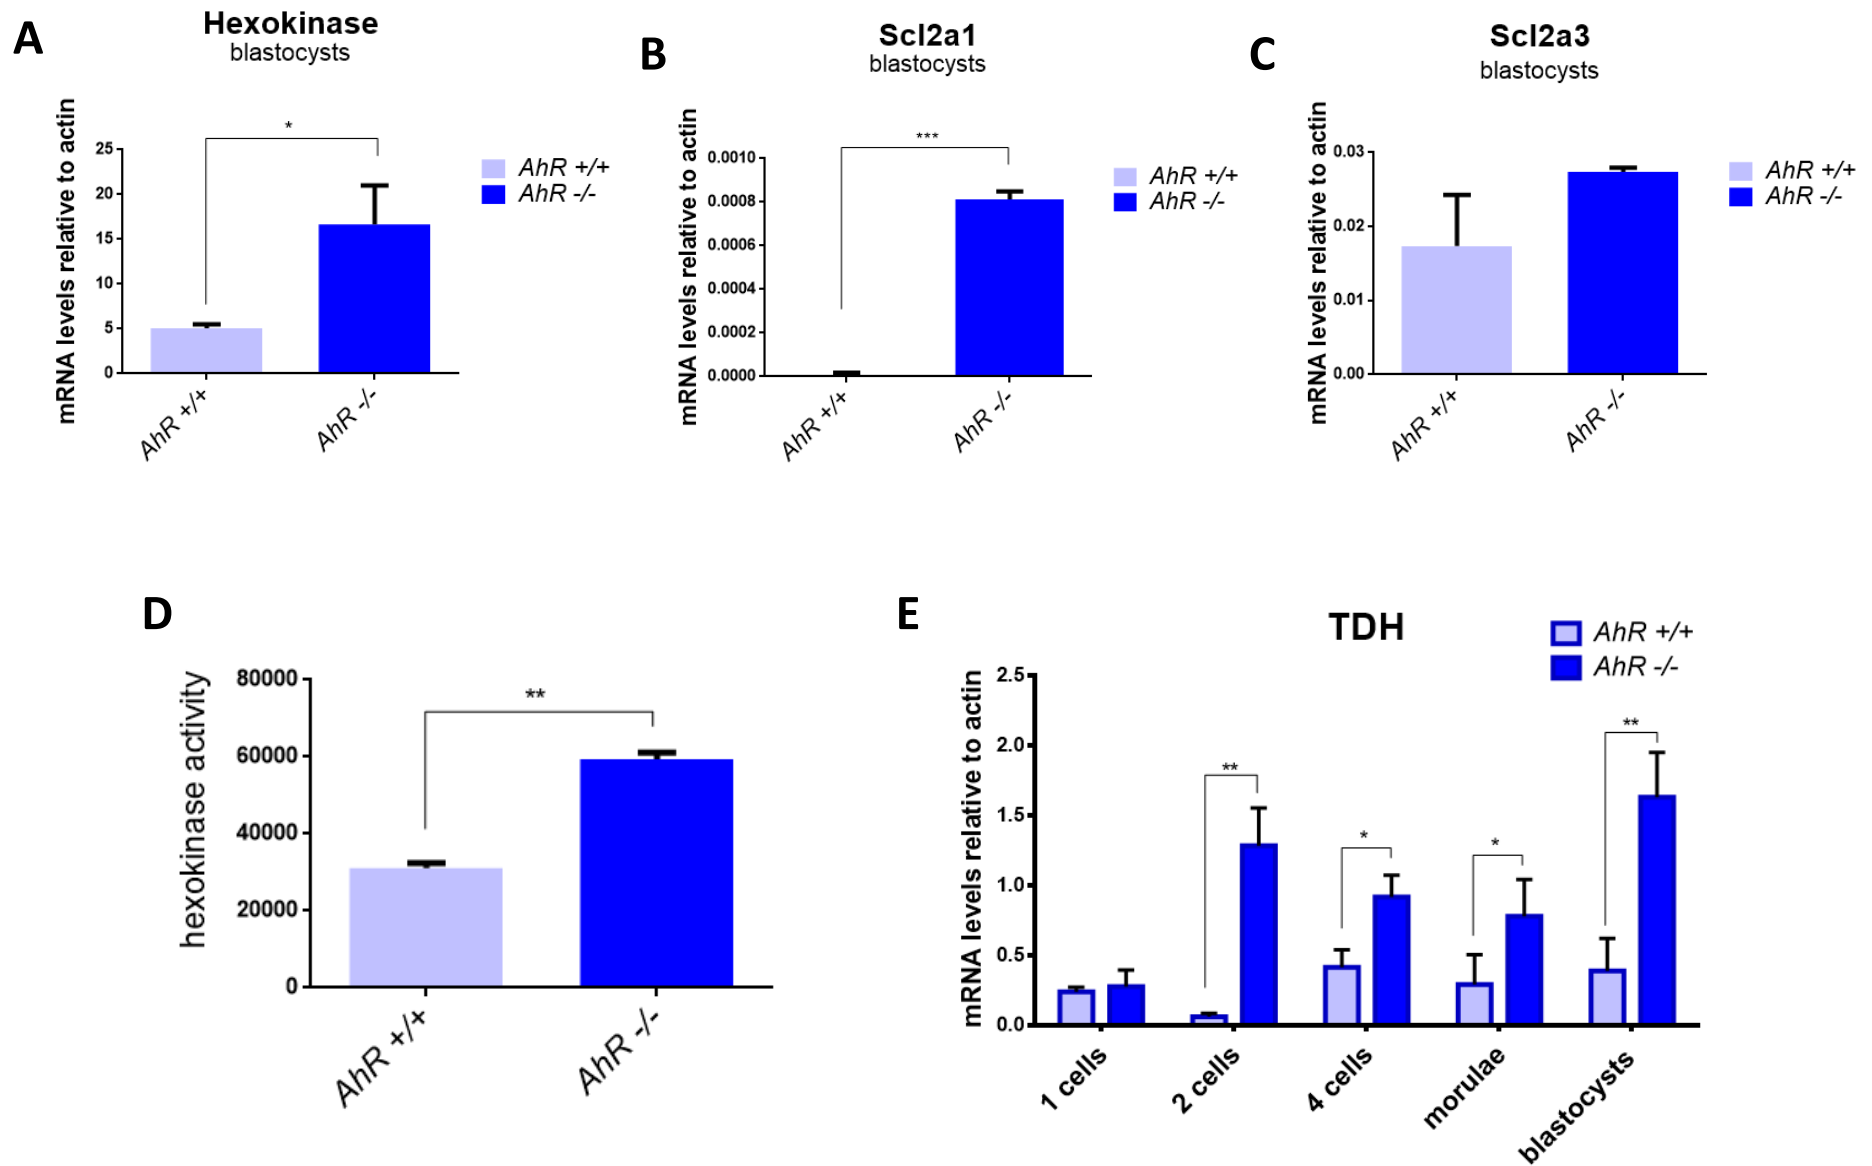

Source: https://www.biorxiv.org/content/biorxiv/early/2020/04/07/2020.04.07.026047.full.pdf
